# Supplementary material for: Systematic review of structural interventions for intimate partner violence in low- and middle-income countries: organizing evidence for prevention
Source: BMC Public Health. 2015 Nov 23;15:1165. doi: 10.1186/s12889-015-2460-4 (PMC4657265; doi:10.1186/s12889-015-2460-4)
Supplement: Additional file 3: Table S3. — Analyses of primary outcomes. (PDF 151 kb) [file 12889_2015_2460_MOESM3_ESM.pdf]

**Table S3 Analyses of primary outcomes**

| First author (year) | Statistical test    | Effect measure                           | Primary outcome(s) <sup>1</sup>                                                                                                                                                                                                                                                     | Effect size                                                                                                                                                                                                                                                                                                                                                                                                                                                                               | Adjustment factors                                                                                                                                                                                                                                                                                               |
|---------------------|---------------------|------------------------------------------|-------------------------------------------------------------------------------------------------------------------------------------------------------------------------------------------------------------------------------------------------------------------------------------|-------------------------------------------------------------------------------------------------------------------------------------------------------------------------------------------------------------------------------------------------------------------------------------------------------------------------------------------------------------------------------------------------------------------------------------------------------------------------------------------|------------------------------------------------------------------------------------------------------------------------------------------------------------------------------------------------------------------------------------------------------------------------------------------------------------------|
| Abramsky (2014) [6] | ANOVA               | Risk ratio (95% CI)                      | <b>IPV:</b> Physical violence in past year<br><b>IPV:</b> Sexual violence in past year                                                                                                                                                                                              | 0.48 (0.16-1.39)<br>0.76 (0.33-1.72)                                                                                                                                                                                                                                                                                                                                                                                                                                                      | Age, marital status, baseline area-level prevalence of IPV, community-pair                                                                                                                                                                                                                                       |
| Ahmed (2005) [24]   | Logistic regression | Odds ratio (95% CI)                      | <b>IPV:</b> Physical or psychological violence in past 4 months                                                                                                                                                                                                                     | Eligible non-member: 1.00<br>Passive member (savings): 1.36 (0.79-2.36)<br>Active member (savings + credit): 1.47 (0.93-2.33)<br>Skilled member (savings + credit + training): 0.64 (0.25-1.66)                                                                                                                                                                                                                                                                                           | Age, schooling, contribution to household income, currently-alive children, age of household head, schooling of household head, household poverty status                                                                                                                                                         |
| Bobonis (2013) [25] | OLS regression      | Odds ratio, <sup>3</sup> <i>p</i> -value | <b>IPV:</b> Physical or sexual violence in past 12 months<br><b>IPV:</b> Physical violence in past 12 months<br><b>IPV:</b> Psychological violence in past 12 months<br><b>IPV:</b> Threats of physical violence in past 12 months<br><b>IPV:</b> Sexual violence in past 12 months | 0.921, <i>p</i> <0.1<br>0.946, <i>p</i> <0.1<br>1.027, <i>p</i> >0.1<br>1.018, <i>p</i> >0.1<br>0.951, <i>p</i> >0.1                                                                                                                                                                                                                                                                                                                                                                      | Woman and partner's age, woman and partner's indigenous status, woman's schooling, partner's schooling, household size, cohabitating couple indicator, years in union, spousal abuse exposure during childhood, individual control interaction terms, individual control polynomial terms, village fixed effects |
| Das (2012) [26]     | OLS regression      | Odds ratio, <sup>3</sup> <i>p</i> -value | Women's role/autonomy<br>Gender roles<br><br>Domestic work<br>Masculinity<br><br>Sexuality<br><br>Knowledge of women/child laws<br>Women do                                                                                                                                         | Activist: 20.29, <i>p</i> =0.000<br>Influenced: 9.68, <i>p</i> =0.000<br>Activist: 132.95, <i>p</i> =0.000<br>Influenced: 24.29, <i>p</i> =0.000<br>Activist: 2.46, <i>p</i> =0.000<br>Influenced: 1.90, <i>p</i> =0.000<br>Activist: 26.31, <i>p</i> =0.000<br>Influenced: 6.89, <i>p</i> =0.000<br>Activist: 12.30, <i>p</i> =0.000<br>Influenced: 4.18, <i>p</i> =0.000<br>Activist: 3.13, <i>p</i> =0.002<br>Influenced: 0.83, <i>p</i> =0.532<br><br>Activist: 0.06, <i>p</i> =0.000 | Age, education, caste, marital status, family structure, religion, occupation                                                                                                                                                                                                                                    |

|                     |                                       |                                              |                                                                                                                                                                                           |                                                                                                                                                                                                                             |                                                                                                                                                                                                                                                                                  |
|---------------------|---------------------------------------|----------------------------------------------|-------------------------------------------------------------------------------------------------------------------------------------------------------------------------------------------|-----------------------------------------------------------------------------------------------------------------------------------------------------------------------------------------------------------------------------|----------------------------------------------------------------------------------------------------------------------------------------------------------------------------------------------------------------------------------------------------------------------------------|
|                     |                                       |                                              | “traditional women’s work”<br>Men do “traditional male work”                                                                                                                              | Influenced: 0.21, $p=0.000$<br><br>Activist: 0.08, $p=0.000$<br>Influenced: 0.24, $p=0.000$                                                                                                                                 |                                                                                                                                                                                                                                                                                  |
| Green (2015) [27]   | OLS regression                        | Odds ratio <sup>3</sup> (95% CI), $p$ -value | <b>IPV:</b> Physical or psychological violence in past 8 months<br><b>IPV:</b> Marital control in past 8 months                                                                           | Trial 1 (WINGS v. control): 1.02 (0.90-1.15), $p>0.1$<br>Trial 2 (W+ v. WINGS): 1.01 (0.87-1.17), $p>0.1$<br><br>Trial 1 (WINGS v. control): 1.15 (1.01-1.31), $p<0.05$<br>Trial 2 (W+ v. WINGS): 0.99 (0.83-1.19), $p>0.1$ | District fixed effect, road distances between villages, 90 baseline and midline covariates                                                                                                                                                                                       |
| Gupta (2013) [28]   | GMM (4-level random intercepts model) | Odds ratio (95% CI), $p$ -value              | <b>IPV:</b> Physical or sexual violence in past year<br><b>IPV:</b> Physical violence in past year<br><b>IPV:</b> Sexual violence in past year<br><b>IPV:</b> Economic abuse in past year | 0.92 (0.58-1.47), $p=0.72$<br><br>0.69 (0.39-1.21), $p=0.19$<br><br>0.71 (0.40-1.25), $p=0.24$<br><br>0.39 (0.25-0.60), $p<0.0001$                                                                                          | Cluster                                                                                                                                                                                                                                                                          |
| Hidrobo (2013) [29] | Linear probability model              | Odds ratio, <sup>3</sup> $p$ -value          | <b>IPV:</b> Physical violence in lifetime<br><b>IPV:</b> Psychological violence (phrased in the present)<br><b>IPV:</b> Controlling behaviors (phrased in the present)                    | 0.98, $p>0.1$<br><br>0.98, $p>0.1$<br><br>0.94, $p<0.05$                                                                                                                                                                    | Woman’s age, years of schooling, race (Afro-Ecuadorian or indigenous), marital status, partner’s years of schooling, history of child death, current pregnancy, number of children 0-5 years old, urban indicator, use of kitchen for sleeping, asset index, asset index squared |
| Hossain (2014) [30] | Unpaired t-test                       | Risk ratio (95% CI)                          | <b>IPV:</b> Physical or sexual violence in past 12 months                                                                                                                                 | 0.52 (0.18-1.51)                                                                                                                                                                                                            | Age group, cohabitation status, literacy, traumatic                                                                                                                                                                                                                              |

|                    |                           |                                         |                                                                                                                                                                           |                                                                                                                                                                                                                                                                                                                                                                                                                                                                                                                                                                                                                                                            |                                                                                                                                                                    |
|--------------------|---------------------------|-----------------------------------------|---------------------------------------------------------------------------------------------------------------------------------------------------------------------------|------------------------------------------------------------------------------------------------------------------------------------------------------------------------------------------------------------------------------------------------------------------------------------------------------------------------------------------------------------------------------------------------------------------------------------------------------------------------------------------------------------------------------------------------------------------------------------------------------------------------------------------------------------|--------------------------------------------------------------------------------------------------------------------------------------------------------------------|
|                    |                           |                                         | <p><b>IPV:</b> More than one act of physical violence or at least one severe act in past 12 months</p> <p><b>IPV:</b> Sexual violence in past 12 months</p>               | <p>0.64 (0.24-1.73)</p> <p>0.50 (0.14-1.80)</p>                                                                                                                                                                                                                                                                                                                                                                                                                                                                                                                                                                                                            | <p>experiences, baseline outcome level, village-pair</p>                                                                                                           |
| Jewkes (2008) [31] | GLMM/GEE                  | Odds ratio (95% CI), <i>p</i> -value    | <p><b>IPV:</b> More than 1 incident of physical or sexual violence since last interview (in past 12 months)</p>                                                           | <p>Women (receipt)<br/>12 months: 0.87 (0.64-1.18), <i>p</i>=0.36<br/>24 months: 1.14 (0.77-1.68), <i>p</i>=0.51<br/>Men (perpetration)<br/>12 months: 0.73 (0.50-1.06), <i>p</i>=0.099<br/>24 months: 0.62 (0.38-1.01), <i>p</i>=0.054</p>                                                                                                                                                                                                                                                                                                                                                                                                                | Geographic stratum, age, time since last visit                                                                                                                     |
| Jewkes (2014) [32] | Random effects regression | Model determined trend, <i>p</i> -value | <p><b>IPV:</b> Physical or sexual violence in last 3 months</p> <p><b>IPV:</b> Physical violence in last 3 months</p> <p><b>IPV:</b> Sexual violence in last 3 months</p> | <p>Women (receipt) at baseline, 2 weeks, 28 weeks, and 52 weeks: 30.3, 25.7, 27.4, 18.9, <i>p</i>=0.037<br/>Men (perpetration) at baseline, 2 weeks, 28 weeks, and 52 weeks: 23.9, 25.3, 26.0, 21.9, <i>p</i>=0.86<br/>Women (receipt) at baseline, 2 weeks, 28 weeks, and 52 weeks: 27.9, 18.3, 25.6, 18.0, <i>p</i>=0.12<br/>Men (perpetration) at baseline, 2 weeks, 28 weeks, and 52 weeks: 16.5, 16.5, 17.3, 12.5, <i>p</i>=0.49<br/>Women (receipt) at baseline, 2 weeks, 28 weeks, and 52 weeks: 9.8, 12.5, 7.7, 3.6, <i>p</i>=0.033<br/>Men (perpetration) at baseline, 2 weeks, 28 weeks, and 52 weeks: 14.7, 16.5, 12.5, 13.5, <i>p</i>=0.69</p> | None                                                                                                                                                               |
| Kim (2007) [33]    | Logistic regression       | Risk ratio (95% CI)                     | <p><b>IPV:</b> Physical or sexual violence in past year</p> <p><b>IPV:</b> Controlling behavior in past year</p>                                                          | <p>0.45 (0.23-0.91)</p> <p>0.80 (0.35-1.83)</p>                                                                                                                                                                                                                                                                                                                                                                                                                                                                                                                                                                                                            | Age, village pair, marital status (only IPV and attitude measures), baseline measure, lifetime experience of IPV by current partner at baseline (only IPV measure) |

|                      |                                                                |                                                                    |                                                                                                                                                                                              |                                                                                                                                                                                                                               |                                                                                                                                                                    |
|----------------------|----------------------------------------------------------------|--------------------------------------------------------------------|----------------------------------------------------------------------------------------------------------------------------------------------------------------------------------------------|-------------------------------------------------------------------------------------------------------------------------------------------------------------------------------------------------------------------------------|--------------------------------------------------------------------------------------------------------------------------------------------------------------------|
| Kim (2009) [34]      | ANOVA and logistic regression                                  | Risk ratio (95% CI)                                                | <b>IPV:</b> Physical or sexual violence in past year<br><br><b>IPV:</b> Controlling behavior in past year                                                                                    | MF <sup>d</sup> v. control: 0.86 (0.22-3.36)<br>IMAGE v. control: 0.51 (0.28-0.93)<br>IMAGE v. MF: 0.59 (0.09-3.66)<br>MF v. control: 1.18 (0.77-1.80)<br>IMAGE v. control: 0.84 (0.38-1.87)<br>IMAGE v. MF: 0.69 (0.35-1.36) | Age group, village triplet, marital status (only attitude measure, others restricted to currently partnered women), education, parity, sex of household head       |
| Kyegombe (2014) [35] | Geometric mean prevalence ratio (statistical test unspecified) | Risk ratio (95% CI)                                                | <b>IPV:</b> Sexual violence in past year                                                                                                                                                     | 0.81 (0.31-2.10)                                                                                                                                                                                                              | Age, marital status, baseline area-level prevalence of the outcome, community-pair                                                                                 |
| Miller (2014) [36]   | Linear mixed-effects regression                                | Between-group comparison on change score (95% CI), <i>p</i> -value | Gender attitudes<br>Attitudes disapproving of violence against women                                                                                                                         | 0.28 (0.12-0.43), <i>p</i> =0.001<br>0.04 (-0.31-0.39), <i>p</i> =0.82                                                                                                                                                        | Age group, religion, school                                                                                                                                        |
| Pronyk (2006) [37]   | Logistic regression                                            | Risk ratio (95% CI)                                                | <b>IPV:</b> Physical or sexual violence in past year<br><br><b>IPV:</b> Controlling behavior in past year                                                                                    | 0.45 (0.23-0.91)<br><br>0.80 (0.35-1.83)                                                                                                                                                                                      | Age, village pair, marital status (IPV and attitudes measure only), baseline measure, lifetime experience of IPV by current partner at baseline (IPV measure only) |
| Pronyk (2008) [38]   | Logistic regression                                            | Risk ratio (95% CI)                                                | More participation in social groups<br>Belief in community support towards common goals<br>Greater perception of community solidarity in a time of crisis<br>Taken part in collective action | 1.85 (0.95-3.61)<br><br>1.11 (0.38-3.24)<br><br>1.65 (0.81-3.37)<br><br>2.06 (0.92-4.49)                                                                                                                                      | Age, village pair, marital status, baseline measure                                                                                                                |

|                       |                                          |                                                                                                                                                  |                                                                                                                                                                                                                       |                                                                                                                                                                                                                                                                                                                                                                                                                                                                                                                                               |                                                                                                                                                                                                                                                     |
|-----------------------|------------------------------------------|--------------------------------------------------------------------------------------------------------------------------------------------------|-----------------------------------------------------------------------------------------------------------------------------------------------------------------------------------------------------------------------|-----------------------------------------------------------------------------------------------------------------------------------------------------------------------------------------------------------------------------------------------------------------------------------------------------------------------------------------------------------------------------------------------------------------------------------------------------------------------------------------------------------------------------------------------|-----------------------------------------------------------------------------------------------------------------------------------------------------------------------------------------------------------------------------------------------------|
| Pulerwitz (2015) [39] | Chi-square test or bivariate regression  | Not reported, <i>p</i> -value                                                                                                                    | <p><b>IPV:</b> Physical or psychological violence in past 3 months</p> <p><b>IPV:</b> Physical violence in past 3 months (perpetration)</p> <p><b>IPV:</b> Psychological violence in past 3 months (perpetration)</p> | <p>Workers at baseline v. follow-up: 25.00 v. 10.94, <math>p&lt;0.05</math></p> <p>Students at baseline v. follow-up: 10.61 v. 3.16, <math>p&lt;0.05</math></p> <p>Workers at baseline v. follow-up: 19.23 v. 10.94, <math>p&gt;0.05</math></p> <p>Students at baseline v. follow-up: 7.58 v. 3.16, <math>p&gt;0.05</math></p> <p>Workers at baseline v. follow-up: 11.54 v. 1.56, <math>p&lt;0.05</math></p> <p>Students at baseline v. follow-up: 5.30 v. 1.58, <math>p&lt;0.05</math></p>                                                  | None                                                                                                                                                                                                                                                |
| Pulerwitz (2015) [40] | GEE                                      | Odds ratio, <i>p</i> -value                                                                                                                      | <p><b>IPV:</b> Physical or sexual violence in the last 6 months (perpetration)</p> <p><b>IPV:</b> Physical, sexual, or psychological violence in the last 6 months (perpetration)</p>                                 | <p>GE+CE<sup>5</sup> v. control: 60% less likely, <i>p</i>-value not given</p> <p>CE v. control: 60% less likely, <i>p</i>-value not given</p> <p>GE+CE v. control: 55% less likely, <i>p</i>-value not given</p> <p>CE v. control: 65% less likely, <math>p=0.06</math></p>                                                                                                                                                                                                                                                                  | Age, GEM Scale score, time, time by intervention group                                                                                                                                                                                              |
| Usdin (2005) [41]     | Logistic regression                      | <p>Baseline to follow-up: percent difference, <i>p</i>-value<sup>6</sup></p> <p>Follow-up by exposure: within column percentages<sup>6</sup></p> | <p>Knowledge and awareness</p> <p>Personal attitudes</p> <p>Subjective norms</p> <p>Behaviors</p>                                                                                                                     | <p>Baseline to follow-up: 14% increase, <math>p\leq 0.05</math></p> <p>By exposure at follow-up: 4-61%<sup>7</sup></p> <p>Baseline to follow-up: non-significant to 18% increase<sup>7</sup>, <math>p\leq 0.05</math></p> <p>By exposure at follow-up: 58-97%<sup>7</sup></p> <p>Baseline to follow-up: 18-59% increase<sup>7</sup>, <math>p\leq 0.05</math></p> <p>By exposure at follow-up: no association to 90%<sup>7</sup></p> <p>Baseline to follow-up: not measured at baseline</p> <p>By exposure at follow-up: 0-62%<sup>7</sup></p> | <p>Baseline to follow-up: area (urban or rural), age, sex, race, education, employment status, general media exposure</p> <p>Follow-up by exposure: area (urban or rural), age, sex, race, education, employment status, general media exposure</p> |
| Wagman (2015) [42]    | Modified Poisson multivariate regression | Prevalence risk ratios (95% CI)                                                                                                                  | <p><b>IPV:</b> Physical violence in past year</p> <p><b>IPV:</b> Sexual violence in past year</p>                                                                                                                     | <p>Women (receipt)</p> <p>16 months: 0.97 (0.85-1.11)</p> <p>35 months: 0.79 (0.67-0.92)</p> <p>Men (perpetration)</p> <p>16 months: 0.80 (0.64-1.00)</p> <p>35 months: 1.00 (0.77-1.30)</p> <p>Women (receipt)</p> <p>16 months: 1.12 (0.96-1.31)</p> <p>35 months: 0.80 (0.67-0.97)</p>                                                                                                                                                                                                                                                     | Age, education, marital status, baseline experience of IPV experience (women) or perpetration (men)                                                                                                                                                 |

|                                                          |                             |
|----------------------------------------------------------|-----------------------------|
| <b>IPV:</b><br>Psychological<br>violence in<br>past year | Men (perpetration)          |
|                                                          | 16 months: 0.90 (0.63-1.28) |
|                                                          | 35 months: 0.81 (0.52-1.26) |
|                                                          | Women (receipt)             |
|                                                          | 16 months: 1.02 (0.92-1.14) |
|                                                          | 35 months: 0.91 (0.79-1.04) |
|                                                          | Men (perpetration)          |
|                                                          | 16 months: 0.88 (0.78-0.98) |
|                                                          | 35 months: 0.99 (0.85-1.16) |

---

<sup>1</sup>Psychological IPV includes violence classified as psychological, emotional, and verbal by authors.

<sup>2</sup>Questions classified as psychological violence included controlling behaviors.

<sup>3</sup>We transformed reported beta-coefficients into odds ratios to increase comparability of effect sizes.

<sup>4</sup>MF = microfinance only intervention

<sup>5</sup>GE = group education, CE = community engagement

<sup>6</sup>Some measures were restricted to specific audiences (i.e., national, urban, or rural audiences or women) or specific media exposures (i.e., exposure to three media sources or high exposure to television, radio, or print media).

<sup>7</sup>The reported range is the smallest and largest percentage for all indicators in the stated category.
