# Supplementary material for: Systematic review of structural interventions for intimate partner violence in low- and middle-income countries: organizing evidence for prevention
Source: Springer Nature journal article supplement (doi:10.1186/s12889-015-2460-4), 2015-11-23
Supplement: MOESM2 [file 9750762]

**Table S2 Characteristics of interventions and studies**

| First author (year) | Category <sup>1</sup> | Country (setting)  | Intervention                                                                                                                                                                 |                                                              |                                                                                                        |                                                                      | Study                              |                                                                                       |                          |                                                                                                                                                                                                                           |                                                                                                                                                                                                                                                         |                        |
|---------------------|-----------------------|--------------------|------------------------------------------------------------------------------------------------------------------------------------------------------------------------------|--------------------------------------------------------------|--------------------------------------------------------------------------------------------------------|----------------------------------------------------------------------|------------------------------------|---------------------------------------------------------------------------------------|--------------------------|---------------------------------------------------------------------------------------------------------------------------------------------------------------------------------------------------------------------------|---------------------------------------------------------------------------------------------------------------------------------------------------------------------------------------------------------------------------------------------------------|------------------------|
|                     |                       |                    | Intervention arm                                                                                                                                                             | Comparison arm                                               | Allocation / targeting                                                                                 | Exposure period                                                      | Data source (year)                 | Study design                                                                          | Sample size <sup>2</sup> | Intervention sample                                                                                                                                                                                                       | Comparison sample                                                                                                                                                                                                                                       | Follow-up <sup>3</sup> |
| Abramsky (2014) [6] | S                     | Uganda (urban)     | SASA!: community mobilization focused on power inequities, targeting men and women in varied roles (e.g., community activists [CA], leaders, police, and healthcare workers) | Community mobilization of police and healthcare workers only | Men and women in 8 purposively selected, pair-matched, randomly allocated communities                  | 2007-2012 (2.8 years within this period due to political disruption) | Study-specific survey (2007, 2012) | Cluster RCT, multistage stratified random sampling of exposed population <sup>4</sup> | 8 clusters (241-928)     | Men or women (same gender as CA), 18-49 years, close proximity to CA, usual resident of household and shared food, community resident ≥1 year (partnered women for IPV and women reporting IPV for IPV response analyses) | Men or women (same gender as passive volunteer), 18-49 years, close proximity to passive volunteer, usual resident of household and shared food, community resident ≥1 year (partnered women for IPV and women reporting IPV for IPV response analyses) | 4 years                |
| Ahmed (2005) [24]   | E                     | Bangladesh (rural) | BRAC: women-focused development (e.g., non-formal education, skill training, and collateral-free loans)                                                                      | None                                                         | Poor households (<0.5 acres of land and sell manual labor for 100+ days annually) in Matlab HDSS areas | 1992-1999 <sup>5</sup>                                               | BRAC-ICDDR,B survey (1999)         | Cross-sectional, unspecified sampling                                                 | 2044 <sup>6</sup>        | Women, married, 15-49 years, BRAC member households in BRAC-ICDDR,B study villages                                                                                                                                        | Women, married, 15-49 years, low-income, non-BRAC member households in BRAC ICDDR,B study villages                                                                                                                                                      | N/A                    |

|                     |   |                             |                                                                                              |      |                                                                                                                                          |                        |                                                                      |                                                                          |         |                                                                                                                                         |                                                                                                                                                  |     |
|---------------------|---|-----------------------------|----------------------------------------------------------------------------------------------|------|------------------------------------------------------------------------------------------------------------------------------------------|------------------------|----------------------------------------------------------------------|--------------------------------------------------------------------------|---------|-----------------------------------------------------------------------------------------------------------------------------------------|--------------------------------------------------------------------------------------------------------------------------------------------------|-----|
| Bobonis (2013) [25] | E | Mexico (rural) <sup>7</sup> | Oportunidades <sup>8</sup> : conditional cash transfers for mothers                          | None | Poor households (based on proxy-means test) in eligible localities (high marginality index and access to a primary and secondary school) | 1997-2003 <sup>5</sup> | National Survey on Relationships within the Household (ENDIREH 2003) | Cross-sectional, nationally representative, random sampling              | 2867    | Women, ≥25 years, married or partnered since 1997 (intact households), children ≤11 years in 1997, receives government support benefits | Women, ≥25 years, married or partnered since 1997 (intact households), children ≤11 years in 1997, does not receive government support benefits  | N/A |
| Das (2012) [26]     | S | India (mostly rural)        | Men's Action to Stop Violence Against Women (MASVAW): individual and community action by men | None | Men in Uttar Pradesh                                                                                                                     | 2002-2009 <sup>5</sup> | Study-specific survey (2009)                                         | Cross-sectional, multi-level random, purposive, and convenience sampling | 361-366 | Men, MASVAW activists                                                                                                                   | Men, non-activists residing in villages with MASVAW activities ("influenced") and men residing in villages without MASVAW activities ("control") | N/A |

|                     |      |                       |                                                                                                                                                                                                                     |                                     |                                                                                                                              |                                                                |                                                 |                                                   |                                                                         |                                                                                                                               |                                                                                                                                      |                                           |
|---------------------|------|-----------------------|---------------------------------------------------------------------------------------------------------------------------------------------------------------------------------------------------------------------|-------------------------------------|------------------------------------------------------------------------------------------------------------------------------|----------------------------------------------------------------|-------------------------------------------------|---------------------------------------------------|-------------------------------------------------------------------------|-------------------------------------------------------------------------------------------------------------------------------|--------------------------------------------------------------------------------------------------------------------------------------|-------------------------------------------|
| Green (2015) [27]   | E    | Uganda (rural)        | Trial 1: Women's Income Generating Support (WINGS): cash transfer and microenterprise training for women<br><br>Trial 2: Women Plus (W+): WINGS and gender/couples training for women and household decision-makers | Trial 1: none<br><br>Trial 2: WINGS | Vulnerable individuals nominated by community and selected by implementing organization in 120 purposively selected villages | Trial 1: 2009-2011<br><br>Trial 2: 2011-2012                   | Study-specific survey (2009, 2011, 2012)        | Cluster RCT                                       | Trial 1: 1734 (men and women), 1488 (women)<br><br>Trial 2: 749 (women) | Men and women, (privileging poor women, 14-30 years) residing in treatment village (women for IPV analyses)                   | Men and women, (privileging poor women, 14-30 years) residing in comparison village (women for IPV analyses)                         | Trial 1: 16 months<br><br>Trial 2: 1 year |
| Gupta (2013) [28]   | E, S | Côte d'Ivoire (rural) | Village Savings and Loans Association (VSLA) for women and Gender Dialogue Groups (GDG) for VSLA members and male partners (or male family members if unpartnered)                                                  | VSLA                                | Women in 24 purposively selected villages                                                                                    | 2010-2012 (8 sessions over 16 weeks beginning in 2011 for GDG) | Study-specific survey (2010, 2012)              | Cluster RCT                                       | 913-934                                                                 | Women and male partners or family members, ≥18 years, no prior group savings participation (partnered women for IPV analyses) | Women, ≥18 years, no prior group savings participation (partnered women for IPV analyses)                                            | 2 years (VSLA)<br><br>1 year (GDG)        |
| Hidrobo (2013) [29] | E    | Ecuador (mixed)       | Bono de Desarrollo Humano (BDH): unconditional cash transfers for mothers                                                                                                                                           | None                                | Poor households (2 lowest wealth quintiles) in randomly selected parishes from 6 provinces                                   | 2004-2006 <sup>5</sup>                                         | Study-specific survey (2003-2004 and 2005-2006) | Cluster RCT, random sampling of survey households | 1218-1246                                                               | Women, living with spouse or partner, at least one preschool age child, no child >6 years, eligible for BDH, not recipient    | Women, living with partner, at least one preschool age child, no child >6 years, eligible for BDH, not recipient of previous welfare | 2 years                                   |

|                     |   |                       |                                                                                                                            |                                                   |                                                                                                                                                                |                                       |                                                         |             |                                |                                                                                                   |                                                                                                                                                                                             |                    |
|---------------------|---|-----------------------|----------------------------------------------------------------------------------------------------------------------------|---------------------------------------------------|----------------------------------------------------------------------------------------------------------------------------------------------------------------|---------------------------------------|---------------------------------------------------------|-------------|--------------------------------|---------------------------------------------------------------------------------------------------|---------------------------------------------------------------------------------------------------------------------------------------------------------------------------------------------|--------------------|
|                     |   |                       |                                                                                                                            |                                                   |                                                                                                                                                                |                                       |                                                         |             |                                | of previous welfare program, intervention parish resident                                         | program, control parish resident                                                                                                                                                            |                    |
| Hossain (2014) [30] | S | Côte d'Ivoire (rural) | Men's discussion group and community-based gender-based violence (GBV) prevention programming                              | Community-based GBV prevention programming        | Men in 12 purposively selected, pair-matched, randomly allocated communities                                                                                   | 2010-2011 (16 sessions over 4 months) | Study-specific survey (2010, 2012)                      | Cluster RCT | 12 clusters (261-346)          | Men, ≥15 years, intervention community resident (current female partner interviewed for analysis) | Men, ≥15 years, group age-matched to intervention village pair men, control community resident with exposure to community GBV programming (current female partner interviewed for analysis) | 16 months          |
| Jewkes (2008) [31]  | S | South Africa (rural)  | Stepping Stones (2 <sup>nd</sup> edition): participatory gender and sexual health learning program targeting men and women | Brief intervention on HIV, safer sex, and condoms | Young men and women in randomly allocated villages (10 km from nearest program community, junior or senior secondary school, community willing to participate) | 2003-2004 (50 hours over 6-8 weeks)   | Study-specific survey (2003-2004, 2004-2005, 2005-2006) | Cluster RCT | 537-559 (women), 504-534 (men) | Men and women, 15-26 years, normally reside in the village where they were at school              | Men and women, 15-26 years, normally reside in the village where they were at school                                                                                                        | 1 year and 2 years |

|                    |      |                      |                                                                                                                                                                                           |                                     |                                                                                                        |                                            |                       |             |                        |                                                                                                                               |                                                                                                                                                                                                   |                 |
|--------------------|------|----------------------|-------------------------------------------------------------------------------------------------------------------------------------------------------------------------------------------|-------------------------------------|--------------------------------------------------------------------------------------------------------|--------------------------------------------|-----------------------|-------------|------------------------|-------------------------------------------------------------------------------------------------------------------------------|---------------------------------------------------------------------------------------------------------------------------------------------------------------------------------------------------|-----------------|
| Jewkes (2014) [32] | E, S | South Africa (urban) | Participatory livelihoods training (Creating Futures) and Stepping Stones (3 <sup>rd</sup> edition)                                                                                       | N/A                                 | Young men and women in 2 informal settlements                                                          | Year not reported (33 hours over 12 weeks) | Study-specific survey | Time series | 122 (women), 110 (men) | Men and women, 18-34 years, out of school                                                                                     | N/A                                                                                                                                                                                               | 28 and 58 weeks |
| Kim (2007) [33]    | E, S | South Africa (rural) | Intervention with Microfinance for AIDS and Gender Equity (IMAGE): microfinance and participatory learning program targeting women (Phase 1) and broader community mobilization (Phase 2) | None                                | Poor households (based on participatory wealth-ranking) in 8 pair-matched, randomly allocated villages | 2001-2005 (2 years during period)          | Study-specific survey | Cluster RCT | 361-845                | Women, ≥18 years, applied for loan, intervention village resident                                                             | Women, ≥18 years, control village resident pair-matched to intervention participant                                                                                                               | 2 years         |
| Kim (2009) [34]    | E, S | South Africa (rural) | Intervention with Microfinance for AIDS and Gender Equity (IMAGE)                                                                                                                         | Microfinance only (MF only) or none | Poor households (based on participatory wealth-ranking) in 12 matched, randomly allocated villages     | 2001-2005 (2 years during period)          | Study-specific survey | Cluster RCT | 12 clusters (331-867)  | Women, ≥18 years, applied for loan, intervention village resident (partnered women for IPV and controlling behavior analyses) | MF only: women, joined MF program in MF only village<br><br>Control: women, ≥18 years, control village resident pair-matched to intervention participant (partnered women for IPV and controlling | 2 years         |

|                      |      |                      |                                                                                                                                                                              |                                                                           |                                                                                                                    |                                                                                   |                                    |                                                                                         |                                         |                                                                                                                                                                                                                                         |                                                                                                                                                                                                                                                                       |         |
|----------------------|------|----------------------|------------------------------------------------------------------------------------------------------------------------------------------------------------------------------|---------------------------------------------------------------------------|--------------------------------------------------------------------------------------------------------------------|-----------------------------------------------------------------------------------|------------------------------------|-----------------------------------------------------------------------------------------|-----------------------------------------|-----------------------------------------------------------------------------------------------------------------------------------------------------------------------------------------------------------------------------------------|-----------------------------------------------------------------------------------------------------------------------------------------------------------------------------------------------------------------------------------------------------------------------|---------|
| Kyegombe (2014) [35] | S    | Uganda (urban)       | SASA!: community mobilization focused on power inequities, targeting men and women in varied roles (e.g., community activists [CA], leaders, police, and healthcare workers) | Community mobilization of police and healthcare workers only <sup>9</sup> | Men and women in 8 pair-matched, randomly-allocated communities <sup>9</sup>                                       | 2007-2012 (2.8 years within this period due to political disruption) <sup>9</sup> | Study-specific survey (2007, 2012) | Cluster RCT, multistage stratified random sampling of exposed population <sup>4,9</sup> | 8 clusters (495-776 women, 473-906 men) | Men or women (same gender as CA), 18-49 years, close proximity to CA, usual resident of household and shared food, community resident $\geq 1$ year, <sup>9</sup> non-polygamous, regular partner in past year (women for IPV analyses) | Men or women (same gender as passive volunteer), 18-49 years, close proximity to passive volunteer, usual resident of household and shared food, community resident $\geq 1$ year, <sup>9</sup> non-polygamous, regular partner in past year (women for IPV analyses) | 4 years |
| Miller (2014) [36]   | S    | India (urban)        | Parivartan: bystander intervention targeting boys                                                                                                                            | None                                                                      | Adolescent boys on cricket teams in 46 purposively selected schools active in the Mumbai School Sports Association | Year not reported (4 months)                                                      | Study-specific survey              | Non-randomized trial                                                                    | 309                                     | Boys, 10-16 years, cricket team member in intervention school                                                                                                                                                                           | Boys, 10-16 years, cricket team member in control school                                                                                                                                                                                                              | 1 year  |
| Pronyk (2006) [37]   | E, S | South Africa (rural) | Intervention with Microfinance for AIDS and Gender Equity (IMAGE)                                                                                                            | None                                                                      | Poor households (based on participatory wealth-ranking) in 8 pair-matched, randomly allocated villages             | 2001-2005 (2 years within this period)                                            | Study-specific survey              | Cluster RCT                                                                             | 8 clusters (524-2221)                   | Women, applied for loan, intervention village resident <sup>10</sup>                                                                                                                                                                    | Women, control village resident pair-matched to intervention participant (randomly selected)                                                                                                                                                                          | 2 years |

|                       |      |                      |                                                                                                     |                    |                                                                                                        |                                                     |                                    |                                                              |                           |                                                                                                    |                                                                                                         |          |
|-----------------------|------|----------------------|-----------------------------------------------------------------------------------------------------|--------------------|--------------------------------------------------------------------------------------------------------|-----------------------------------------------------|------------------------------------|--------------------------------------------------------------|---------------------------|----------------------------------------------------------------------------------------------------|---------------------------------------------------------------------------------------------------------|----------|
| Pronyk (2008) [38]    | E, S | South Africa (rural) | Intervention with Microfinance for AIDS and Gender Equity (IMAGE)                                   | None               | Poor households (based on participatory wealth-ranking) in 8 pair-matched, randomly allocated villages | 2001-2005 (2 years within this period)              | Study-specific survey              | Cluster RCT                                                  | 8 clusters (810-845)      | Women, applied for loan, intervention village resident                                             | Women, control village resident pair-matched to intervention participant                                | 2 years  |
| Pulerwitz (2015) [39] | S    | China (not stated)   | Participatory gender learning program targeting men                                                 | N/A                | Young men from 3 vocational schools and 8 workplaces                                                   | 2010 (eight 2-hour sessions over 6 months)          | Study specific survey (2010, 2010) | Before-after evaluation                                      | 219 workers, 496 students | Men, 15-24 years, employed at selected workplaces or non-graduating students at vocational schools | N/A                                                                                                     | 9 months |
| Pulerwitz (2015) [40] | S    | Ethiopia (urban)     | Male Norms Initiative: interactive group education (GE) and community engagement (CE) targeting men | CE only or none    | Young men from 11 youth groups in 3 sub-cities                                                         | June-Nov. 2008 (eight 2- or 3-hour sessions for GE) | Study-specific survey              | Quasi-experimental cluster RCT                               | 645 <sup>6</sup>          | Men, 15-24 years, member of youth group in intervention sub-city (partnered men for IPV analyses)  | Men, 15-24 years, member of youth group in CE only or control sub-city (partnered men for IPV analyses) | 6 months |
| Usdin (2005) [41]     | S    | South Africa (mixed) | Soul City Fourth Series (SC4): national domestic violence media campaign targeting men and women    | None <sup>11</sup> | Men and women in “African” and “Colored” communities                                                   | July-Dec. 1999                                      | Study-specific survey              | Before-after evaluation, stratified national random sampling | 1981 <sup>6</sup>         | Men and women, 16-65 years, “African” or “Colored”                                                 | N/A <sup>11</sup>                                                                                       | 7 months |

|                    |   |                |                                                                                          |                               |                                                   |           |                                                         |             |                                    |                                                                                                                                                         |                                                                                                                                                         |                      |
|--------------------|---|----------------|------------------------------------------------------------------------------------------|-------------------------------|---------------------------------------------------|-----------|---------------------------------------------------------|-------------|------------------------------------|---------------------------------------------------------------------------------------------------------------------------------------------------------|---------------------------------------------------------------------------------------------------------------------------------------------------------|----------------------|
| Wagman (2015) [42] | S | Uganda (rural) | Safe Homes and Respect for Everyone (SHARE): community mobilization and HIV intervention | Standard of care HIV services | Men and women from 11 randomly allocated clusters | 2006-2009 | Study-specific survey (2005-2006, 2006-2008, 2008-2009) | Cluster RCT | 3775-4768 (women), 2511-3074 (men) | Men and women, 15-49 years (completed Rakai Community Cohort Study interview and provided blood for HIV testing at baseline and follow up for analyses) | Men and women, 15-49 years (completed Rakai Community Cohort Study interview and provided blood for HIV testing at baseline and follow up for analyses) | 16 months, 35 months |
|--------------------|---|----------------|------------------------------------------------------------------------------------------|-------------------------------|---------------------------------------------------|-----------|---------------------------------------------------------|-------------|------------------------------------|---------------------------------------------------------------------------------------------------------------------------------------------------------|---------------------------------------------------------------------------------------------------------------------------------------------------------|----------------------|

<sup>1</sup>Abbreviations represent categories of structural interventions: E = economic and S = social.

<sup>2</sup>Sample sizes are reported for the most inclusive model(s) for outcome(s) of interest. For studies with multiple outcomes of interest, ranges reflect the models with the smallest and largest sample sizes. Inclusion of cases with missing data is assumed where authors did not specify complete case analysis.

<sup>3</sup>The length of follow-up is given as the time from intervention initiation to follow-up measurement.

<sup>4</sup>The study evaluation used cross-sectional surveys with independent samples at baseline and follow-up, representing the population “mostly likely to have had repeated and extensive contact with intervention activities” (p. 4) [6].

<sup>5</sup>The exposure period represents the period from intervention initiation to data collection, or the total potential exposure period. Exposure periods may differ among individual participants; the authors did not report measuring exposure periods for individual participants.

<sup>6</sup>The presented sample size represents the full study sample. The authors did not report sample size(s) for outcome(s) of interest.

<sup>7</sup>*Oportunidades* targeted rural, semi-urban, and urban localities. This represents an analytic restriction.

<sup>8</sup>The study measured participation in *Oportunidades* as “whether the woman receives benefits from any government support program” (p. 186) [26]. The authors note that “there are other small government programs that provide non-cash benefits,” although “*Oportunidades* is the largest and most generous cash transfer program” (p. 186) [26].

<sup>9</sup>As described in Abramsky [6]

<sup>10</sup>The study included three cohorts. We present only cohort one, composed of IMAGE participants and matched controls, because measured outcomes in cohorts two and three focused on HIV.

<sup>11</sup>The study compares the full sample before and after the intervention. Groups also were defined retrospectively at follow-up by intervention exposure (no/low exposure, moderate exposure, and high media exposure).
